# Supplementary material for: High-performance hydrogen evolution reaction in quadratic nodal line semimetal Na2CdSn
Source: PubMed Central journal article supplement — iScience. 2024 Aug 12;27(9):110708. doi: 10.1016/j.isci.2024.110708 (PMC11387805; doi:10.1016/j.isci.2024.110708), 2024-08-12
Supplement: mmc1.pdf [file mmc1.pdf]

iScience, Volume 27

## Supplemental information

### High-performance hydrogen evolution reaction in quadratic nodal line semimetal $\text{Na}_2\text{CdSn}$

Zihan Li, Zeqing He, Lirong Wang, Weizhen Meng, Xuefang Dai, Guodong Liu, Ying Liu, and Xiaoming Zhang

## Supporting Information

### High-performance hydrogen evolution reaction in quadratic nodal line semimetal $\text{Na}_2\text{CdSn}$

Zihan Li<sup>1</sup>, Zeqing He<sup>1</sup>, Lirong Wang<sup>1</sup>, Weizhen Meng<sup>2\*</sup>, Xuefang Dai<sup>1</sup>, Guodong Liu<sup>1</sup>, Ying Liu<sup>1\*</sup>, Xiaoming Zhang<sup>1</sup>

<sup>1</sup> State Key Laboratory of Reliability and Intelligence of Electrical Equipment, and School of Materials Science and Engineering, Hebei University of Technology, Tianjin, 300130, China.

<sup>2</sup> College of Physics, Hebei Key Laboratory of Photophysics Research and Application, Hebei Normal University, Shijiazhuang 050024, China.

#### Contact information:

\*Correspondence: [ying\\_liu@hebut.edu.cn](mailto:ying_liu@hebut.edu.cn), [mengweizhen@hebtu.edu.cn](mailto:mengweizhen@hebtu.edu.cn)

Lead Contact: Ying Liu ([ying\\_liu@hebut.edu.cn](mailto:ying_liu@hebut.edu.cn))

## Supplemental Figures (Figure S1 - S5)

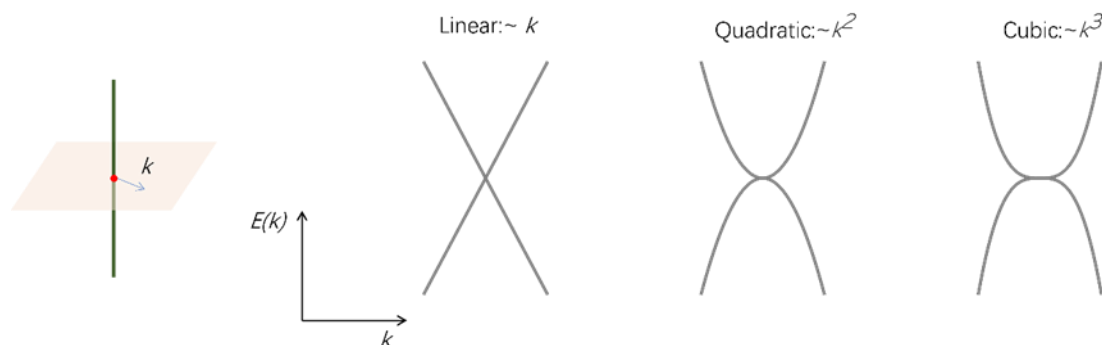

**Figure S1. Schematic diagram of conventional and high-order nodal lines (Related to Figure 1).** The linear, quadratic and cubic crossing points in momentum space.

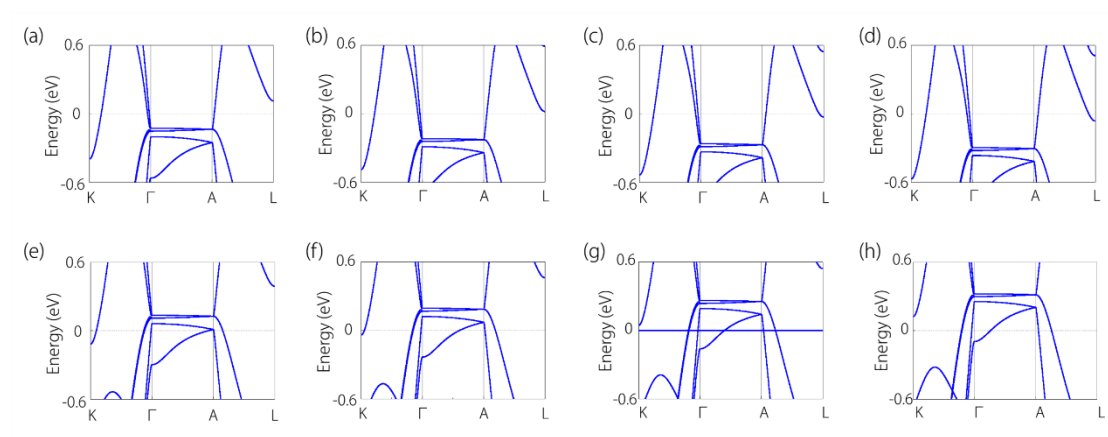

**Figure S2. Electronic band structures of doped electrons and holes (Related to Figure 4).**

(a-d) Electronic band structure for Na<sub>2</sub>CdSn with doping electrons, where the number of electrons is 0.05, 0.1, 0.15, 0.2.

(e-h) Electronic band structure for Na<sub>2</sub>CdSn with doping holes, where the number of holes is 0.05, 0.1, 0.15, and 0.2.

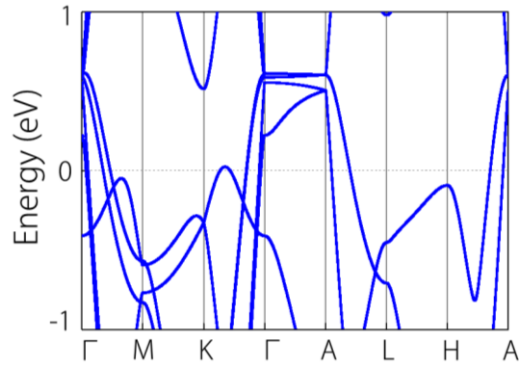

**Figure S3. Electronic band structure for Na<sub>2</sub>CdSn with doping 0.5-holes (Related to Figure 4).**

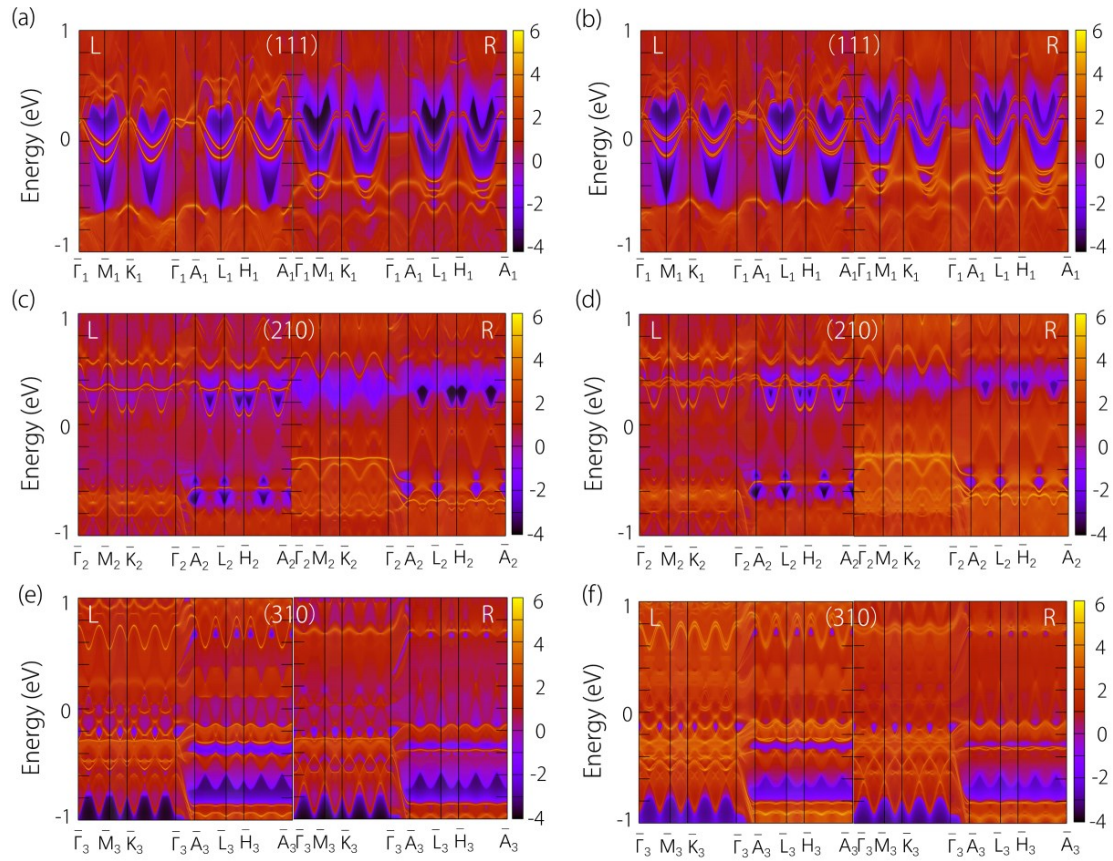

**Figure S4. Surface states of Na<sub>2</sub>CdSn on different surfaces (Related to Figure 3).**

(a, b) Projected surface spectra on the (111) surface with/without SOC.

(c, d) Projected surface spectra on the (210) surface with/without SOC.

(e, f) Projected surface spectra on the (310) surface with/without SOC.

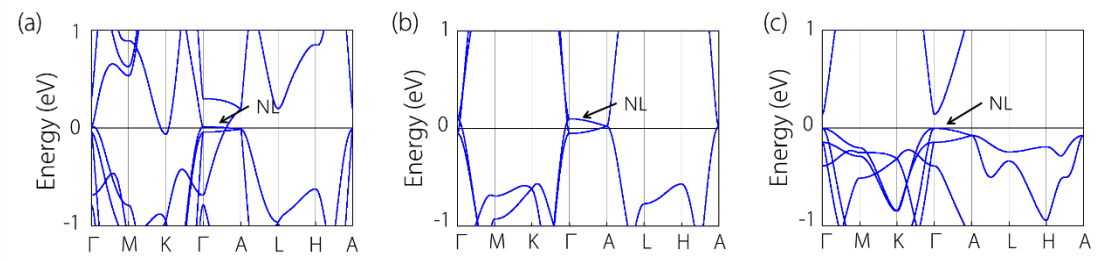

**Figure S5. Electronic band structures of other three QNL materials (Related to Figure 6).**

(a-c) Electronic band structures of  $\text{Na}_2\text{MgPb}$ ,  $\text{KHgAs}$ , and  $\text{K}_2\text{NaAs}$ , respectively.
